# Supplementary material
Source: HighWire-hosted journal article supplement (https://www.cmaj.ca/highwire/filestream/58360/field_highwire_adjunct_files/2/recombinant-lin-3-at.pdf)

**Appendix 3:** Forest plots of summary estimates of outcomes (control of bleeding, red blood cell transfusion and number of patients receiving transfusions) from randomized controlled trials of the off-label therapeutic use of recombinant factor VIIa (rFVIIa) in patients without hemophilia

**Control of bleeding**

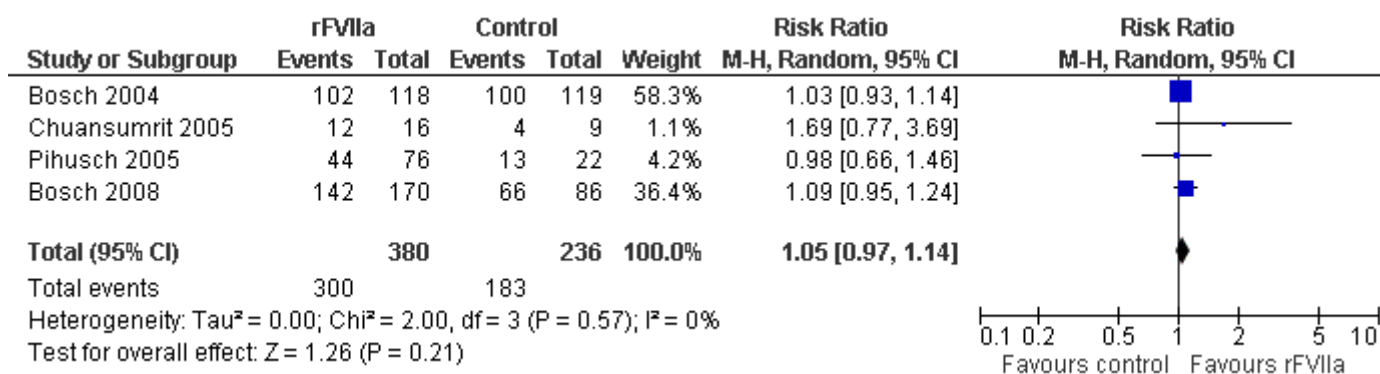

## Red blood cell transfusion, mL

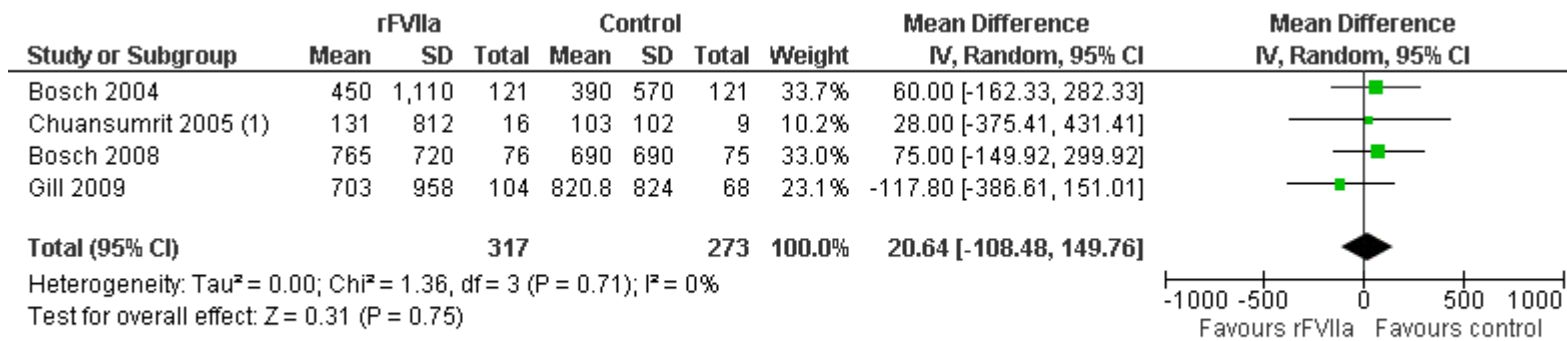

(1) Data provided per kg and converted to mL according to average weights for the mean ages indicated

## Number of patients receiving transfusions

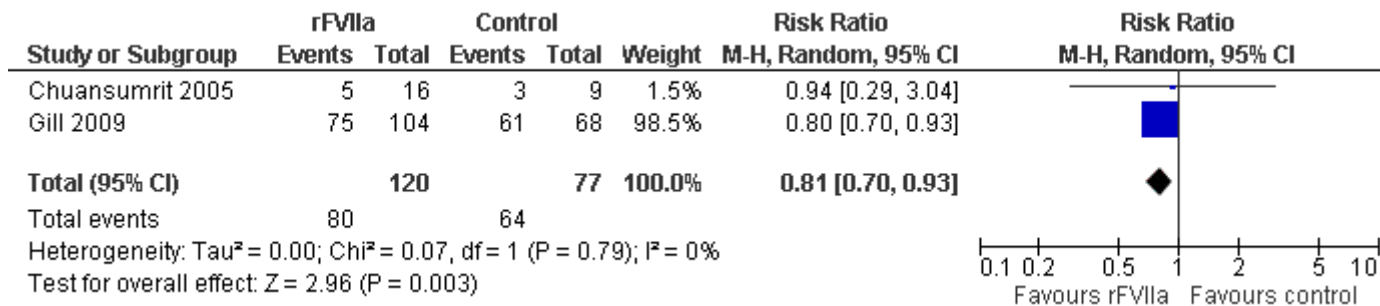

Supplement: recombinant-lin-3-at.pdf [file recombinant-lin-3-at.pdf]
